# Supplementary material
Source: PubMed Central journal article supplement (PMC3884817)
Supplement: NIHMS541240-supplement-1.pdf [file NIHMS541240-supplement-1.pdf]

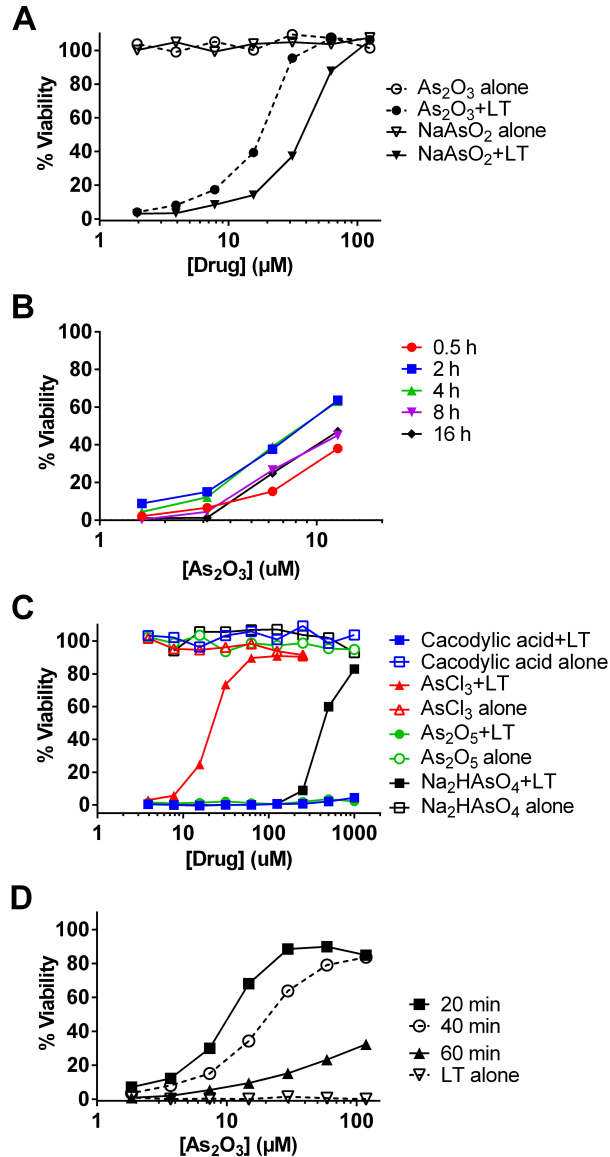

**Supplemental Figure 1. NaAsO<sub>2</sub> and As<sub>2</sub>O<sub>3</sub> protect RAW264.7 cells from LT-induced pyroptosis.** (A) RAW264.7 cells were incubated with variable concentrations of NaAsO<sub>2</sub> or As<sub>2</sub>O<sub>3</sub> for 15 min before challenge with LT (1 μg/mL). (B) RAW264.7 cells were treated with As<sub>2</sub>O<sub>3</sub> for the indicated times and concentrations followed by challenge with LT (1 μg/mL). (C) RAW264.7 cells were incubated with variable concentrations of arsenic (III) chloride (AsCl<sub>3</sub>), sodium arsenate (Na<sub>2</sub>HAsO<sub>4</sub>), arsenic (V) oxide (As<sub>2</sub>O<sub>5</sub>), or cacodylic acid for 15 min before challenge with LT (1 μg/mL). (D) RAW264.7 cells were challenged with LT (1 μg/mL) and at various times after toxin addition As<sub>2</sub>O<sub>3</sub> was added. In all panels, cell viability was assessed by MTT staining after 2 h of toxin treatment. Percent viability was assessed compared to untreated cells.
