# Supplementary material
Source: PubMed Central journal article supplement (PMC3884817)
Supplement: NIHMS541240-supplement-4.pdf [file NIHMS541240-supplement-4.pdf]

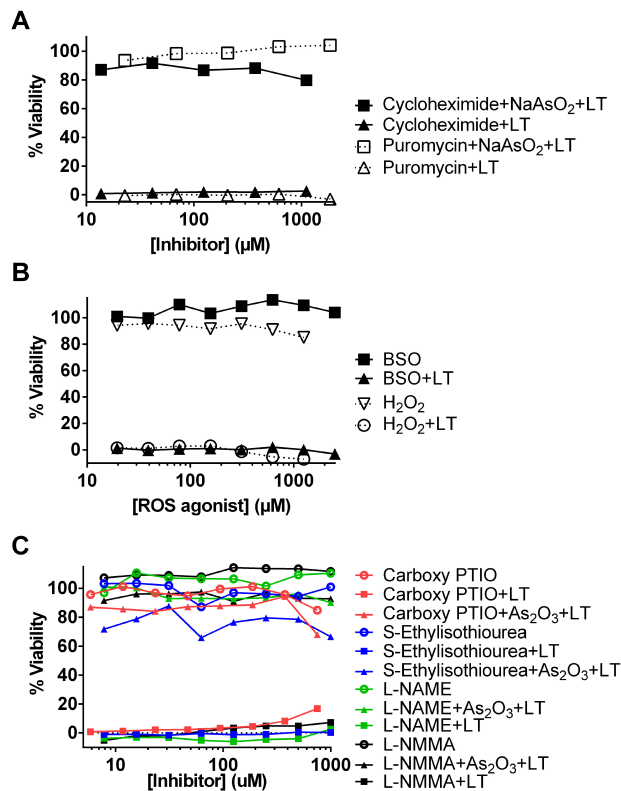

**Supplemental Figure 4. Arsenic based protection is not dependent on protein synthesis or nitric oxide induction, and general ROS induction is not protective.** (A) RAW264.7 cells were treated with variable concentrations of cycloheximide or puromycin for 1 h before incubation with NaAsO<sub>2</sub> (75 μM, 15 min). Cells were then challenged with LT (1 μg/mL). (B) RAW264.7 cells were treated with variable concentrations of buthionine sulfoximine or hydrogen peroxide for 16 h. Cells were then challenged with LT (1 μg/mL). (C) RAW264.7 cells were treated with various inhibitors of nitric oxide for 1 h before incubation with As<sub>2</sub>O<sub>3</sub> (50 μM, 15min). Cells were then challenged with LT (1 μg/mL). In all panels, cell viability was assessed by MTT staining after 2 h of toxin treatment. Percent viability was assessed compared to untreated cells.
